# Supplementary material for: Characteristics, management and response to alteplase in China versus non-China participants of the ENCHANTED trial
Source: PubMed Central journal article supplement — Stroke Vasc Neurol. 2017 May 22;2(2):53–8. doi: 10.1136/svn-2017-000085 (PMC5600017; doi:10.1136/svn-2017-000085), 2017-05-22
Supplement: svn-2017-000085supp001.pdf [file svn-2017-000085supp001.pdf]

Suppl Table 1 Use of alteplase and management details from randomisation to Day 7

|                                                               | Non-China             | China                 | P value |
|---------------------------------------------------------------|-----------------------|-----------------------|---------|
| <b>Body Weight</b>                                            |                       |                       |         |
| Patients with estimated body weight prior to alteplase        | 1878/1878 (100)       | 1419/1419 (100)       |         |
| Estimated measurement prior to alteplase use (kg)             | 71.4 (16.1)           | 67.6 (11.5)           | <0.0001 |
| Patients with direct measured body weight after alteplase use | 1673/1878 (89.1)      | 1297/1419 (91.4)      | 0.03    |
| Direct measured body weight after alteplase use (kg)          | 70.7 (16.3)           | 67.5 (11.5)           | <0.0001 |
| <b>Alteplase given</b>                                        |                       |                       |         |
| Any given                                                     | 1854/1876 (98.8)      | 1391/1415 (98.3)      | 0.21    |
| Bolus dose (mg)*                                              | 6.4 (2.0)             | 6.1 (1.1)             | <0.0001 |
| Infusion over 60 mins dose (mg)*                              | 46.6 (14.7)           | 44.5 (12.8)           | <0.0001 |
| Time from randomization to treatment (mins)                   | 4.2 (1.5 - 7.5)       | 9.5 (3.7 - 18.1)      | <0.0001 |
| Time from stroke onset to treatment (mins)                    | 146.0 (110.0 - 192.0) | 200.0 (160.0 - 235.0) | <0.0001 |
| <b>Management</b>                                             |                       |                       |         |
| Cerebral angiogram undertaken                                 | 149/1876 (7.9)        | 22/1412 (1.6)         | <0.0001 |
| Occluded cerebral vessel identified                           | 134/ 148 (90.5)       | 17/ 22 (77.3)         | 0.07    |
| Endovascular clot retrieval used                              | 114/ 149 (76.5)       | 10/ 22 (45.5)         | 0.002   |
| Any intravenous BP lowering treatment in first 24 hours       | 408/1866 (21.9)       | 385/1405 (27.4)       | 0.0003  |
| Any intravenous BP lowering treatment in days 2-7             | 277/1854 (14.9)       | 335/1380 (24.3)       | <0.0001 |
| Systolic BP at 24 hours (mmHg)                                | 136.6 (21.1)          | 136.9 (17.7)          | 0.65    |
| Intubation and ventilation                                    | 119/1854 (6.4)        | 51/1380 (3.7)         | 0.0006  |
| Fever occurrence                                              | 329/1853 (17.8)       | 290/1380 (21.0)       | 0.02    |
| Fever treated                                                 | 275/1628 (16.9)       | 243/1236 (19.7)       | 0.0566  |
| Nasogastric feeding given                                     | 345/1853 (18.6)       | 238/1380 (17.2)       | 0.32    |
| Patient mobilized by therapist                                | 1159/1853 (62.5)      | 295/1380 (21.4)       | <0.0001 |
| Compression stockings used                                    | 229/1852 (12.4)       | 54/1380 (3.9)         | <0.0001 |
| Subcutaneous heparin used                                     | 407/1878 (21.7)       | 220/1419 (15.5)       | <0.0001 |

|                                                                           | Non-China        | China           | P value |
|---------------------------------------------------------------------------|------------------|-----------------|---------|
| Any antithrombotic agent (antiplatelet or heparin) used in first 24 hours | 387/1870 (20.7)  | 185/1412 (13.1) | <0.0001 |
| Intravenous traditional Chinese medicine administered                     | 8/1853 (0.4)     | 931/1380 (67.5) | <0.0001 |
| Intravenous steroids administered                                         | 24/1853 (1.3)    | 53/1380 (3.8)   | <0.0001 |
| Hemicraniectomy performed                                                 | 26/1854 (1.4)    | 9/1380 (0.7)    | 0.04    |
| Any neurosurgery performed                                                | 98/1878 (5.2)    | 16/1419 (1.1)   | <0.0001 |
| Any stroke unit admission                                                 | 1463/1854 (78.9) | 514/1380 (37.2) | <0.0001 |
| Any intensive care unit admission                                         | 428/1853 (23.1)  | 344/1380 (24.9) | 0.23    |
| Any rehabilitation given                                                  | 1135/1854 (61.2) | 506/1380 (36.7) | <0.0001 |
| Decision to withdrawal active care                                        | 53/1855 (2.9)    | 32/1380 (2.3)   | 0.34    |

\*P value is significant

Data are n (%), mean (SD), or median (IQR). The P values are based on Chi-square, T test, or Wilcoxon signed-rank test

BP: blood pressure; NIHSS: The National Institutes of Health Stroke Scale

Suppl Table 2 Major clinical outcomes at 90 days by non-China versus China

| Outcome                                     | Event, n(%)     | OR<br>(95% CI)  | P value | AOR <sup>1</sup><br>(95% CI) | P value | AOR <sup>2</sup><br>(95% CI) | P value |
|---------------------------------------------|-----------------|-----------------|---------|------------------------------|---------|------------------------------|---------|
| Death or disability: mRS score 2 to 6       |                 |                 |         |                              |         |                              |         |
| Non-China                                   | 999/1797 (55.6) | 1.0             |         |                              |         |                              |         |
| China                                       | 673/1409 (47.8) | 0.73(0.64-0.84) | <0.0001 | 0.66(0.55-0.79)              | <0.0001 | 0.75(0.6-0.93)               | 0.01    |
| Death or major disability: mRS score 3 to 6 |                 |                 |         |                              |         |                              |         |
| Non-China                                   | 708/1797 (39.4) | 1.0             |         |                              |         |                              |         |
| China                                       | 489/1409 (34.7) | 0.82(0.71-0.94) | 0.01    | 0.8(0.66-0.97)               | 0.02    | 0.86(0.68-1.08)              | 0.20    |
| Death during follow-up at 90 days           |                 |                 |         |                              |         |                              |         |
| Non-China                                   | 189/1878 (10.1) |                 |         |                              |         |                              |         |
| China                                       | 121/1419 (8.5)  | 0.83(0.66-1.06) | 0.13    | 0.66(0.47-0.92)              | 0.02    | 0.5(0.33-0.76)               | 0.01    |

AOR: adjusted odds ratio; mRS: modified Rankin Scale; OR: odds ratio

Model 1: adjusted for age, adjusted for age, baseline GCS score, time from onset to randomization (<3 vs. ≥3 hr), sex, baseline systolic blood pressure, pre-morbid mRS (0 or 1), pre-morbid use of aspirin, other antiplatelet agent or warfarin anticoagulant, any history of stroke, coronary artery disease, atrial fibrillation, hypercholesterolemia, randomized treatment (low-dose vs. standard-dose), and stroke subtype

Model 2: model 1+ management factors: intravenous BP lowering treatment at day 1, intubation, fever therapist, stockings, subcutaneous heparin used, intravenous steroids administration, neurosurgery and admission rehabilitation given.

Suppl Table 3 Key secondary outcomes- Symptomatic intracerebral hemorrhage by non-China versus China

|                     | Non-China       | China           | OR              | P value | AOR*            | P value |
|---------------------|-----------------|-----------------|-----------------|---------|-----------------|---------|
| SITS-MOST criteria  | 27/1878 (1.4)   | 25/1419 (1.8)   | 1.23(0.71-2.13) | 0.46    | 1.19(0.59-2.41) | 0.63    |
| NINDS criteria      | 133/1878 (7.1)  | 96/1419 (6.8)   | 0.95(0.73-1.25) | 0.72    | 0.94(0.67-1.32) | 0.72    |
| ECASS2 criteria     | 81/1878 (4.3)   | 61/1419 (4.3)   | 1(0.71-1.4)     | 0.98    | 0.93(0.61-1.44) | 0.75    |
| ECASS3 criteria     | 34/1878 (1.8)   | 28/1419 (2.0)   | 1.09(0.66-1.81) | 0.73    | 1.1(0.58-2.12)  | 0.76    |
| IST-3 criteria      | 47/1878 (2.5)   | 37/1419 (2.6)   | 1.04(0.67-1.61) | 0.85    | 0.98(0.56-1.69) | 0.93    |
| Fatal               | 17/1878 (0.9)   | 16/1419 (1.1)   | 1.25(0.63-2.48) | 0.53    | 0.92(0.35-2.47) | 0.87    |
| Adjudicated any ICH | 355/1878 (18.9) | 216/1419 (15.2) | 0.77(0.64-0.93) | 0.01    | 0.82(0.65-1.03) | 0.08    |

\* adjusted for baseline NIHSS score, pre-morbid use of aspirin, atrial fibrillation, time from onset to treatment and randomized treatment (low-dose vs. standard-dose), and stroke subtype

ECASS: European Co-operative Acute Stroke Study; ICH: intracerebral hemorrhage; IST: International Stroke Trial, NINDS: National Institute of Neurological Disorders and Stroke; OR: odds ratio; SITS-MOST: Safe Implementation of Thrombolysis in Stroke Monitoring Study

Suppl Table 4 Randomised treatment effects on symptomatic intracerebral hemorrhage outcomes by non-China versus China

|                     | Low-dose        | Standard-dose   | OR(95%CI)        | P value for interaction |
|---------------------|-----------------|-----------------|------------------|-------------------------|
| SITS-MOST criteria  |                 |                 |                  |                         |
| Non-China           | 9/ 946 (1.0)    | 18/ 932 (1.9)   | 0.49(0.22 -1.09) | 0.94                    |
| China               | 8/ 708 (1.1)    | 17/ 711 (2.4)   | 0.47(0.2 -1.09)  |                         |
| NINDS criteria      |                 |                 |                  |                         |
| Non-China           | 56/ 946 (5.9)   | 77/ 932 (8.3)   | 0.7(0.49 -1)     | 0.74                    |
| China               | 42/ 708 (5.9)   | 54/ 711 (7.6)   | 0.77(0.51 -1.16) |                         |
| ECASS2 criteria     |                 |                 |                  |                         |
| Non-China           | 30/ 946 (3.2)   | 51/ 932 (5.5)   | 0.57(0.36 -0.9)  | 0.59                    |
| China               | 25/ 708 (3.5)   | 36/ 711 (5.1)   | 0.69(0.41 -1.16) |                         |
| ECASS3 criteria     |                 |                 |                  |                         |
| Non-China           | 11/ 946 (1.2)   | 23/ 932 (2.5)   | 0.46(0.23 -0.96) | 0.99                    |
| China               | 9/ 708 (1.3)    | 19/ 711 (2.7)   | 0.47(0.21 -1.04) |                         |
| IST-3 criteria      |                 |                 |                  |                         |
| Non-China           | 20/ 946 (2.1)   | 27/ 932 (2.9)   | 0.72(0.4 -1.3)   | 0.51                    |
| China               | 13/ 708 (1.8)   | 24/ 711 (3.4)   | 0.54(0.27 -1.06) |                         |
| Fatal ICH           |                 |                 |                  |                         |
| Non-China           | 5/ 946 (0.5)    | 12/ 932 (1.3)   | 0.41(0.14 -1.16) | 0.79                    |
| China               | 4/ 708 (0.6)    | 12/ 711 (1.7)   | 0.33(0.11 -1.03) |                         |
| Adjudicated any ICH |                 |                 |                  |                         |
| Non-China           | 175/ 946 (18.5) | 180/ 932 (19.3) | 0.95(0.75 -1.19) | 0.70                    |
| China               | 102/ 708 (14.4) | 114/ 711 (16.0) | 0.88(0.66 -1.18) |                         |

CI: confidence interval; ECASS: European Co-operative Acute Stroke Study; IST: International Stroke Trial; NINDS: National Institute of Neurological Disorders and Stroke; OR: odds ratio; SITS-MOST: Safe Implementation of Thrombolysis in Stroke Monitoring Study
